# Supplementary material for: Inflammation blood and tissue factors of plaque growth in an experimental model evidenced by a systems approach
Source: Front Genet. 2014 Apr 7;5:70. doi: 10.3389/fgene.2014.00070 (PMC3985011; doi:10.3389/fgene.2014.00070)
Supplement: Supplementary Table 1 — Expression data for secretome proteins and circulatory factors in CNTL, HF and HHF groups. [file DataSheet2.XLSX]

## Sheet: Foglio1
Category	Name	CNTL mean	HF1	HF2	HF3	HF4	HHF1	HHF4	HHF6	HHF7	HHF8	HHF10
Dependent variables
Histology
Mean Intimal Thickness	mean IT (mm)	0.021	0.25	0.29	0.08	0.59	0.200833	0.608095	1.41	0.27	0.456	0.65
Median Intimal Thickness	median IT (mm)	0.016	0.19	0.2	0.07	0.46	0.125	0.49	1.48	0.12	0.42	0.35
Mean Lesion Area	mean LA (mm2)	0.01	0.413304	0.309945	0.13	0.85	0.945556	1.46111	5.47	0.68	1.19	1.9
Median Lesion Area	median LA (mm2)	0.01	0.205936	0.17563	0.11	0.65	0.98	1.535	4.96	0.54	1.22	0.8
Independent variables
Lipoproteins
tot chol end-diet	tot chol end-diet (mg/dl)	61.3333	461	558	613.2	587	408	634.4	531.3	777.6	462	528
LDL end-diet	LDL end-diet (mg/dl)	27.8	368	474	527	492	344	578	476.4	732	428.8	507.4
HDL end-diet	HDL end-diet (mg/dl)	27.6667	89	80	84	87	51	52	21	32	22	24
ox LDL end-diet	ox LDL end-diet (U/ml)	5.02333	22.13	22.64	44.14	20.02	16.67	21.44	132.43	45.88	35.89	20.69
Circolatory factors
ICAM baseline	ICAM baseline (ng/ml)	663	805.847	572.152	557.637	387.809	265.882	387.809	1025.03	326.845	456.514	945.193
ICAM end-diet	ICAM end-diet (ng/ml)	599.53	921.484	596.344	723.11	497.157	494.254	498.608	525.22	214.111	522.8	766.656
IL6 baseline	IL6 baseline (pg/ml)	64	8.495	235.368	147.628	0	325.238	41.021	1	37.133	118.821	13.871
IL6 end-diet	IL6 end-diet (pg/ml)	102	1	255.452	1	38.621	300.658	1	1	248.622	218.53	2.341
TNFa baseline	TNFa baseline (pg/ml)	120	135.19	138.73	47.65	111.92	107.98	29.51	34.24	40.55	62.24	57.9
TNFa end-diet	TNFa end-diet (pg/ml)	86.68	676.59	66.97	46.46	2518.47	146.23	37.39	49.22	36.6	29.51	2132.82
Secreted Proteins
Uniprot code	Gene name
O02772	FABPH_PIG	547333	330000	244000	418000	731000	1210000	99789	799000	760000	1020000	246000
O11780	BGH3_PIG	1093000	993000	1380000	1490000	1300000	676000	830000	1240000	1510000	884000	842000
O46409	APOA4_PIG	6.04333e+06	1830000	11400000	5200000	3400000	1680000	1170000	4040000	4590000	3490000	2170000
O62839	CATA_PIG	801667	468000	822000	749000	618000	634000	423000	1310000	652000	1000000	1120000
P00355	G3P_PIG	1.87333e+06	3510000	1800000	1810000	979000	2790000	4510000	5250000	1710000	5070000	4500000
P00795	CATD_PIG	82883	94760	74897	422000	344000	936000	1070000	993000	118000	982000	918000
P02540	DESM_PIG	3.32333e+07	49200000	52000000	35300000	39600000	46100000	59000000	56000000	54300000	42900000	48100000
P02543	VIME_PIG	2.60333e+07	29900000	31400000	28800000	31700000	57900000	67000000	50000000	42300000	49000000	40500000
P04163	S10AA_PIG	286289	141000	120000	77950	301000	316000	377000	7176.5	82095	50172	95504
P04366	AMBP_PIG	726333	461000	594000	128000	1490000	22896	188000	212000	77572	487000	579000
P04574	CPNS1_PIG	69205	51890	68648	163000	430000	270000	250000	223000	169000	190000	314000
P08132	ANXA4_PIG	1836.7	24236	2014.2	3165.1	2661.7	4789.7	2063.4	844.01	89410	3056.9	8101.3
P10859	HPLN1_PIG	143000	21489	14227	7463.7	142000	9105.8	16374	18032	15374	9714.9	14327
P12675	ICAL_PIG	1.76333e+06	5140000	4590000	3930000	2560000	3830000	5270000	6100000	7000000	8380000	3300000
P14287	OSTP_PIG	106969	102000	128000	81696	117000	220000	297000	209000	661980	309000	248000
P18648	APOA1_PIG	8.45679e+06	25800000	29400000	45400000	31600000	18000000	12300000	22900000	20300000	22800000	31100000
P18650	APOE_PIG	1180000	1360000	1610000	1010000	2390000	6520000	4400000	9320000	3330000	5100000	2960000
P19619	ANXA1_PIG	280000	215000	202000	63850	518000	273000	453000	233000	10291	201000	492000
P19620	ANXA2_PIG	3.68667e+06	5310000	9010000	16600000	1360000	3610000	5050000	5820000	4090000	3190000	14100000
P20112	SPRC_PIG	2.01133e+06	433000	380000	1010000	198000	1030000	367000	520000	418000	289000	208000
P20305	GELS_PIG	1.06767e+07	6950000	6920000	7220000	8530000	4720000	8490000	10800000	12600000	10700000	6740000
P23687	PPCE_PIG	114688	21315	17304	29518	11168	700000	141000	42150	30461	462000	557000
P26042	MOES_PIG	3.46667e+06	4640000	3190000	3860000	1840000	5990000	7400000	9150000	4470000	5890000	7140000
P26044	RADI_PIG	2850000	9170000	2800000	6500000	1190000	7210000	5100000	3170000	6580000	2520000	8290000
P26234	VINC_PIG	45100000	65700000	50600000	50300000	46400000	54300000	64400000	33800000	57800000	54900000	33300000
P26893	IL6_PIG	6.06333e+06	5030000	4040000	4490000	3520000	11300000	3710000	1960000	3290000	2440000	4600000
P27917	APOC3_PIG	40673.7	150000	30572	45684	16218	65683	97442	78726	405000	72193	28033
P31950	S10AB_PIG	430333	1400000	1380000	1320000	289000	1840000	864000	2060000	681000	1500000	2380000
P35624	TIMP1_PIG	1.21767e+06	581000	238000	142000	3600000	475000	90011	524000	1520000	555000	136000
Q29116	TENA_PIG	2.93667e+06	3080000	908000	1600000	1530000	2200000	1450000	2200000	2370000	1550000	2650000
Q29411	CH3L1_PIG	78582	69749	57227	87492	194000	481000	827000	1200000	191000	1160000	1390000
Q29549	CLUS_PIG	1.34667e+06	536000	650000	736000	963000	939000	1070000	1280000	670000	1160000	1740000
Q2EN75	S10A6_PIG	232000	112000	210000	117000	65873	423000	415000	756000	346000	369000	451000
Q3ZD69	LMNA_PIG	10250000	18900000	12600000	19500000	9700000	21000000	14400000	19500000	18400000	15200000	16300000
Q49I35	LEG1_PIG	3.28667e+06	954000	3810000	769000	3900000	3170000	2990000	17600000	12600000	12700000	1840000
Q8MJ14	GPX1_PIG	120790	150000	51146	154000	53777	251000	341000	417000	164000	299000	395000
Q95274	TYB4_PIG	781000	876000	289000	710000	139000	1060000	371000	380000	299000	195000	1420000
Q9GKQ6	PGS1_PIG	1.28933e+06	1010000	1430000	469000	948000	2060000	1500000	1030000	648000	1100000	1030000
Q9XSD9	PGS2_PIG	332667	737000	1040000	351000	1820000	1800000	430000	1430000	170000	1260000	882000
